# Supplementary material for: High-Specificity Targeted Functional Profiling in Microbial Communities with ShortBRED
Source: PubMed Central journal article supplement (PMC4684307; doi:10.1371/journal.pcbi.1004557), 2015-12-18

# ShortBRED Spearman Correlation on the ARDB, Matching at 95% Identity

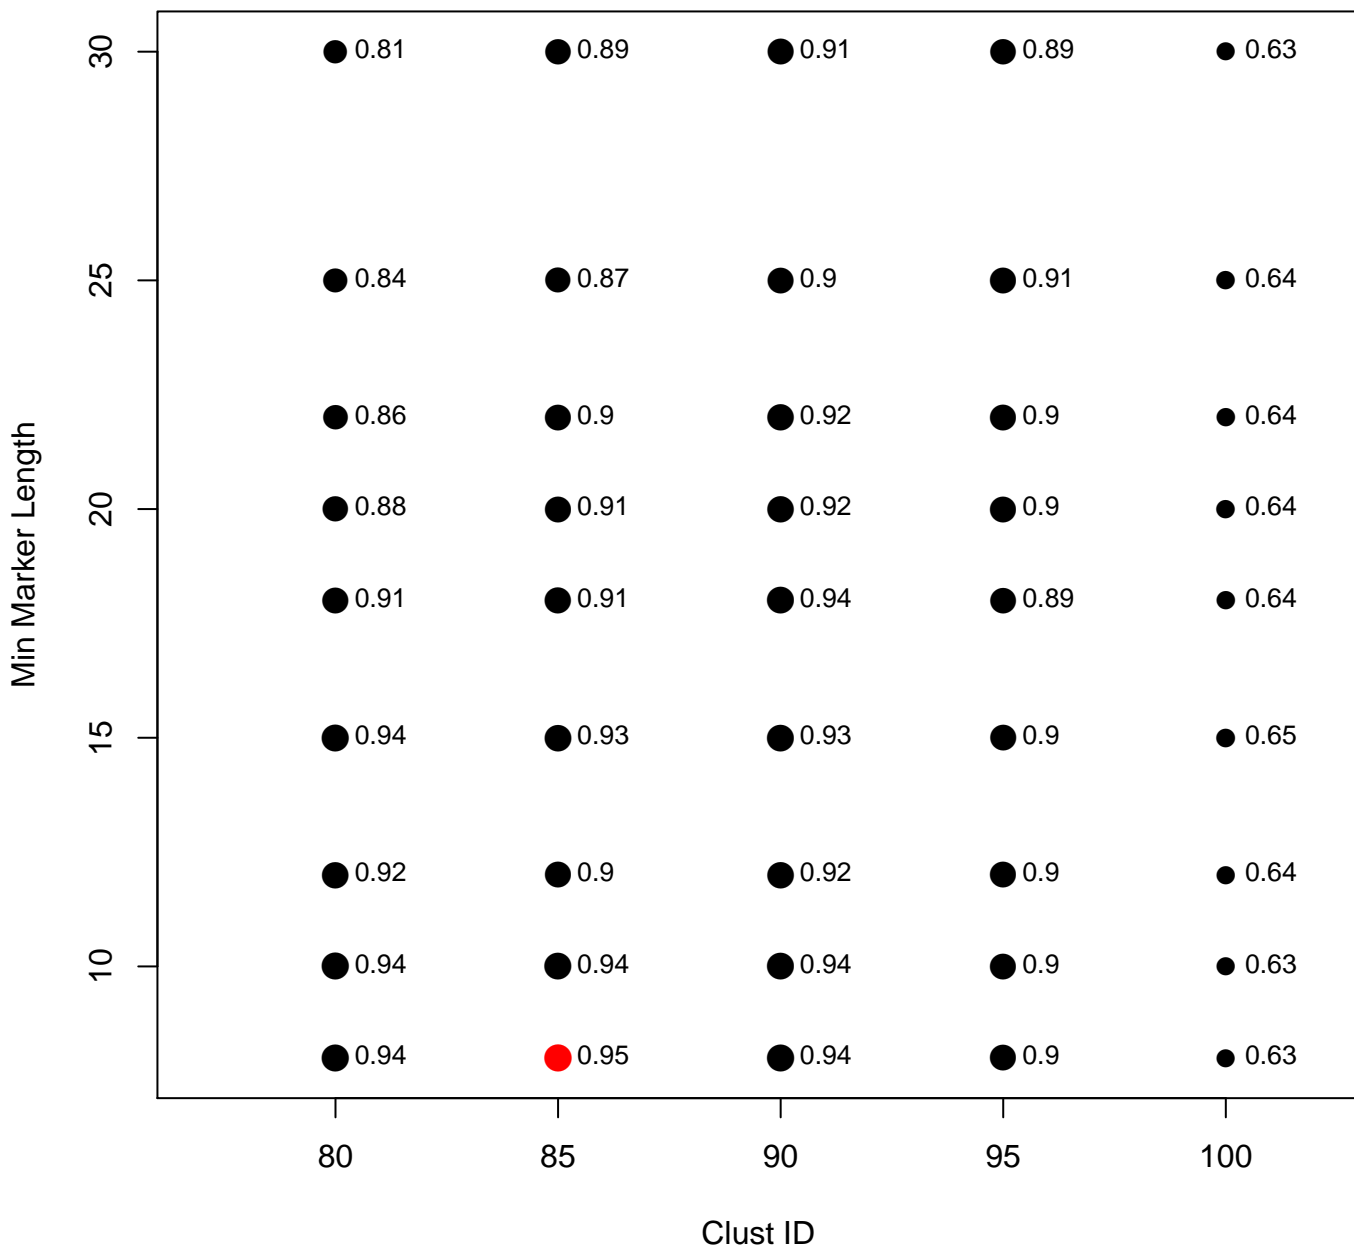

Supplement: pcbi.1004557.s007.pdf [file pcbi.1004557.s007.pdf]
