# Supplementary material for: High-Specificity Targeted Functional Profiling in Microbial Communities with ShortBRED
Source: PLoS Comput Biol. 2015 Dec 18;11(12):e1004557. doi: 10.1371/journal.pcbi.1004557 (PMC4684307; doi:10.1371/journal.pcbi.1004557)
Supplement: S1 Table — This table displays measures of the performance of ShortBRED and centroids to profile synthetic metagenomes. The results for ShortBRED using its default settings on the six synthetic metagenomes are in bold. Illumina_05,Illumina_10, and Illumina_25 represent synthetic Illumina metagenomes with reads from input dataset sequences comprising 5%, 10%, and 25% of the metagenome. Illumina-mutated-3pct and Illumina-mutated-5pct metagenomes had 3% and 5% of their amino acid content mutated before being incorporated into the metagenome. Centroids were also obtained by clustering at 85% identity. Any result mapping to centroid with length ≥30 and ID ≥95% was considered a “match”. (XLSX) [file pcbi.1004557.s011.xlsx]

## Sheet: AllSyntheticMGResults
Table S1 - Performance of ShortBRED and Centroid Method across Synthetic Metagenomes
Dataset	SyntheticMG	ClustID	MarkerLength	MatchID	ShortBRED AUC	Centroids AUC	ShortBRED Spearman	Centroids Spearman	ShortBRED Specificity	Centroids Specificity	ShortBRED Sensitivity	Centroids Sensitivity
ARDB	Illumina_05	80	8	0.95	0.972524	0.94436	0.943409	0.831575	0.981432	0.912467	0.952756	0.92126
ARDB	Illumina_05	80	10	0.95	0.969078	0.94436	0.943993	0.831575	0.986737	0.912467	0.944882	0.92126
ARDB	Illumina_05	80	12	0.95	0.946177	0.94436	0.920908	0.831575	0.98939	0.912467	0.897638	0.92126
ARDB	Illumina_05	80	15	0.95	0.960619	0.94436	0.94154	0.831575	0.994695	0.912467	0.929134	0.92126
ARDB	Illumina_05	80	18	0.95	0.939337	0.94436	0.905022	0.831575	0.986737	0.912467	0.889764	0.92126
ARDB	Illumina_05	80	20	0.95	0.923401	0.94436	0.882687	0.831575	0.986737	0.912467	0.858268	0.92126
ARDB	Illumina_05	80	22	0.95	0.907486	0.94436	0.855225	0.831575	0.986737	0.912467	0.826772	0.92126
ARDB	Illumina_05	80	25	0.95	0.893064	0.94436	0.839017	0.831575	0.98939	0.912467	0.795276	0.92126
ARDB	Illumina_05	80	30	0.95	0.882224	0.94436	0.814435	0.831575	0.981432	0.912467	0.779528	0.92126
ARDB	Illumina_05	85	8	0.95	0.97759	0.955341	0.947971	0.803686	0.987552	0.86722	0.963235	0.941176
ARDB	Illumina_05	85	10	0.95	0.9674	0.955341	0.936816	0.803686	0.989627	0.86722	0.941176	0.941176
ARDB	Illumina_05	85	12	0.95	0.944182	0.955341	0.903722	0.803686	0.985477	0.86722	0.897059	0.941176
ARDB	Illumina_05	85	15	0.95	0.961916	0.955341	0.927613	0.803686	0.985477	0.86722	0.933824	0.941176
ARDB	Illumina_05	85	18	0.95	0.950688	0.955341	0.913061	0.803686	0.985477	0.86722	0.911765	0.941176
ARDB	Illumina_05	85	20	0.95	0.943137	0.955341	0.905024	0.803686	0.985477	0.86722	0.897059	0.941176
ARDB	Illumina_05	85	22	0.95	0.939491	0.955341	0.902025	0.803686	0.985477	0.86722	0.889706	0.941176
ARDB	Illumina_05	85	25	0.95	0.921665	0.955341	0.874342	0.803686	0.983402	0.86722	0.852941	0.941176
ARDB	Illumina_05	85	30	0.95	0.930193	0.955341	0.8855	0.803686	0.981328	0.86722	0.867647	0.941176
ARDB	Illumina_10	85	8	0.95	0.975854	0.951709	0.939181	0.82082	0.975962	0.800481	0.970297	0.965347
ARDB	Illumina_25	85	8	0.95	0.982689	0.929264	0.955587	0.809321	0.975309	0.765432	0.982993	0.965986
ARDB	Illumina-mutated-3pct_05	85	8	0.95	0.936198	0.953105	0.884982	0.785821	0.986616	0.913958	0.884211	0.936842
ARDB	Illumina-mutated-3pct_10	85	8	0.95	0.951024	0.939449	0.905162	0.80024	0.969697	0.815851	0.920635	0.952381
ARDB	Illumina-mutated-3pct_25	85	8	0.95	0.954809	0.931366	0.92066	0.815655	0.954545	0.79697	0.940972	0.958333
ARDB	Illumina-mutated-5pct_05	85	8	0.95	0.888384	0.94981	0.837599	0.775887	0.990548	0.913043	0.786517	0.932584
ARDB	Illumina-mutated-5pct_10	85	8	0.95	0.909056	0.923094	0.863169	0.787986	0.98044	0.836186	0.837321	0.91866
ARDB	Illumina-mutated-5pct_25	85	8	0.95	0.938974	0.925615	0.908588	0.798519	0.979228	0.771513	0.893238	0.950178
ARDB	Illumina_05	90	8	0.95	0.971999	0.973104	0.942944	0.787626	0.988353	0.831947	0.952055	0.979452
ARDB	Illumina_05	90	10	0.95	0.967987	0.973104	0.936016	0.787626	0.986689	0.831947	0.945205	0.979452
ARDB	Illumina_05	90	12	0.95	0.962164	0.973104	0.92315	0.787626	0.981697	0.831947	0.938356	0.979452
ARDB	Illumina_05	90	15	0.95	0.964238	0.973104	0.933341	0.787626	0.986689	0.831947	0.938356	0.979452
ARDB	Illumina_05	90	18	0.95	0.970722	0.973104	0.936601	0.787626	0.985025	0.831947	0.952055	0.979452
ARDB	Illumina_05	90	20	0.95	0.959166	0.973104	0.920361	0.787626	0.983361	0.831947	0.931507	0.979452
ARDB	Illumina_05	90	22	0.95	0.956876	0.973104	0.920756	0.787626	0.985025	0.831947	0.924658	0.979452
ARDB	Illumina_05	90	25	0.95	0.940926	0.973104	0.901843	0.787626	0.986689	0.831947	0.890411	0.979452
ARDB	Illumina_05	90	30	0.95	0.943616	0.973104	0.905414	0.787626	0.986689	0.831947	0.89726	0.979452
ARDB	Illumina_05	95	8	0.95	0.966397	0.976482	0.901625	0.718649	0.974668	0.793727	0.953333	0.993333
ARDB	Illumina_05	95	10	0.95	0.965809	0.976457	0.901577	0.718691	0.975845	0.793478	0.953333	0.993333
ARDB	Illumina_05	95	12	0.95	0.962811	0.975665	0.902895	0.716772	0.978287	0.792521	0.946667	0.993333
ARDB	Illumina_05	95	15	0.95	0.962433	0.971359	0.900522	0.710675	0.978287	0.792521	0.946667	0.986667
ARDB	Illumina_05	95	18	0.95	0.958552	0.971372	0.893084	0.709836	0.975933	0.791817	0.94	0.986667
ARDB	Illumina_05	95	20	0.95	0.963614	0.971386	0.904631	0.710638	0.978313	0.792771	0.946667	0.986667
ARDB	Illumina_05	95	22	0.95	0.968964	0.971386	0.904104	0.710638	0.975904	0.792771	0.96	0.986667
ARDB	Illumina_05	95	25	0.95	0.972205	0.971386	0.905262	0.710638	0.974699	0.792771	0.966667	0.986667
ARDB	Illumina_05	95	30	0.95	0.962911	0.971359	0.888051	0.710675	0.972256	0.792521	0.953333	0.986667
ARDB	Illumina_05	100	8	0.95	0.923323	0.895222	0.63005	0.563387	0.906064	0.878716	0.933333	0.84
ARDB	Illumina_05	100	10	0.95	0.91969	0.891409	0.632815	0.556659	0.909851	0.876418	0.92	0.833333
ARDB	Illumina_05	100	12	0.95	0.922888	0.894572	0.63592	0.559867	0.909308	0.875895	0.926667	0.84
ARDB	Illumina_05	100	15	0.95	0.928963	0.895287	0.651557	0.568537	0.914868	0.883094	0.932886	0.838926
ARDB	Illumina_05	100	18	0.95	0.924623	0.890439	0.640563	0.560484	0.912291	0.882458	0.926174	0.832215
ARDB	Illumina_05	100	20	0.95	0.924669	0.89066	0.642602	0.5609	0.913174	0.882036	0.926174	0.832215
ARDB	Illumina_05	100	22	0.95	0.925645	0.895346	0.642025	0.568761	0.912552	0.884593	0.926174	0.838926
ARDB	Illumina_05	100	25	0.95	0.925039	0.895436	0.644029	0.569743	0.913927	0.884638	0.926174	0.838926
ARDB	Illumina_05	100	30	0.95	0.913754	0.895356	0.630934	0.569441	0.913927	0.883443	0.906667	0.84
VF	Illumina_05	80	8	0.95	0.982008	0.984863	0.928944	0.792116	0.991141	0.954664	0.966216	0.972973
VF	Illumina_05	80	10	0.95	0.988824	0.984863	0.936935	0.792116	0.991141	0.954664	0.97973	0.972973
VF	Illumina_05	80	12	0.95	0.988794	0.984863	0.934223	0.792116	0.99062	0.954664	0.97973	0.972973
VF	Illumina_05	80	15	0.95	0.985154	0.984863	0.922545	0.792116	0.989057	0.954664	0.972973	0.972973
VF	Illumina_05	80	18	0.95	0.985166	0.984863	0.922572	0.792116	0.989057	0.954664	0.972973	0.972973
VF	Illumina_05	80	20	0.95	0.985173	0.984863	0.917499	0.792116	0.988015	0.954664	0.972973	0.972973
VF	Illumina_05	80	22	0.95	0.985168	0.984863	0.914981	0.792116	0.987493	0.954664	0.972973	0.972973
VF	Illumina_05	80	25	0.95	0.985182	0.984863	0.915008	0.792116	0.987493	0.954664	0.972973	0.972973
VF	Illumina_05	80	30	0.95	0.978254	0.984863	0.892244	0.792116	0.984367	0.954664	0.959459	0.972973
VF	Illumina_05	85	8	0.95	0.98214	0.984944	0.934761	0.785621	0.992268	0.952577	0.966443	0.973154
VF	Illumina_05	85	10	0.95	0.988898	0.984944	0.939964	0.785621	0.991753	0.952577	0.979866	0.973154
VF	Illumina_05	85	12	0.95	0.988873	0.984944	0.939903	0.785621	0.991753	0.952577	0.979866	0.973154
VF	Illumina_05	85	15	0.95	0.985257	0.984944	0.923001	0.785621	0.989175	0.952577	0.973154	0.973154
VF	Illumina_05	85	18	0.95	0.985249	0.984944	0.917929	0.785621	0.988144	0.952577	0.973154	0.973154
VF	Illumina_05	85	20	0.95	0.985259	0.984944	0.912983	0.785621	0.987113	0.952577	0.973154	0.973154
VF	Illumina_05	85	22	0.95	0.985254	0.984944	0.910522	0.785621	0.986598	0.952577	0.973154	0.973154
VF	Illumina_05	85	25	0.95	0.985264	0.984944	0.910544	0.785621	0.986598	0.952577	0.973154	0.973154
VF	Illumina_05	85	30	0.95	0.981793	0.984944	0.892457	0.785621	0.983505	0.952577	0.966443	0.973154
VF	Illumina_10	85	8	0.95	0.991616	0.990551	0.972453	0.922693	0.988813	0.944065	0.9875	0.9875
VF	Illumina_25	85	8	0.95	0.994037	0.993237	0.983857	0.963011	0.991312	0.931364	0.992537	0.99467
VF	Illumina-mutated-3pct_05	85	8	0.95	0.965369	0.992294	0.912984	0.806541	0.991765	0.957797	0.931507	0.986301
VF	Illumina-mutated-3pct_10	85	8	0.95	0.969096	0.993096	0.949172	0.937568	0.991895	0.952618	0.940206	0.989691
VF	Illumina-mutated-3pct_25	85	8	0.95	0.975419	0.994769	0.951859	0.969456	0.998232	0.949602	0.950939	0.993737
VF	Illumina-mutated-5pct_05	85	8	0.95	0.904978	0.99167	0.858846	0.815666	0.994845	0.959794	0.812081	0.986577
VF	Illumina-mutated-5pct_10	85	8	0.95	0.902104	0.990232	0.861242	0.927044	0.994354	0.94542	0.808081	0.989899
VF	Illumina-mutated-5pct_25	85	8	0.95	0.928541	0.992013	0.876602	0.96689	0.998249	0.960595	0.857445	0.986272
VF	Illumina_05	90	8	0.95	0.978776	0.992157	0.931188	0.790911	0.992363	0.952138	0.959732	0.986577
VF	Illumina_05	90	10	0.95	0.98892	0.992157	0.942995	0.790911	0.992363	0.952138	0.979866	0.986577
VF	Illumina_05	90	12	0.95	0.988884	0.992157	0.940227	0.790911	0.991853	0.952138	0.979866	0.986577
VF	Illumina_05	90	15	0.95	0.988924	0.992157	0.937639	0.790919	0.99134	0.952114	0.979866	0.986577
VF	Illumina_05	90	18	0.95	0.988892	0.992157	0.927187	0.790919	0.989302	0.952114	0.979866	0.986577
VF	Illumina_05	90	20	0.95	0.988926	0.992157	0.92725	0.790919	0.989302	0.952114	0.979866	0.986577
VF	Illumina_05	90	22	0.95	0.988914	0.992157	0.922176	0.790919	0.988283	0.952114	0.979866	0.986577
VF	Illumina_05	90	25	0.95	0.988916	0.992157	0.919683	0.790919	0.987774	0.952114	0.979866	0.986577
VF	Illumina_05	90	30	0.95	0.988858	0.992157	0.902756	0.790919	0.984208	0.952114	0.979866	0.986577
VF	Illumina_05	95	8	0.95	0.981815	0.992082	0.931409	0.784755	0.992008	0.951049	0.966443	0.986577
VF	Illumina_05	95	10	0.95	0.991961	0.992082	0.943195	0.784755	0.992008	0.951049	0.986577	0.986577
VF	Illumina_05	95	12	0.95	0.988557	0.992081	0.934384	0.78477	0.991	0.951	0.979866	0.986577
VF	Illumina_05	95	15	0.95	0.988608	0.99208	0.934479	0.784777	0.990995	0.950975	0.979866	0.986577
VF	Illumina_05	95	18	0.95	0.988591	0.992081	0.924139	0.78477	0.989	0.951	0.979866	0.986577
VF	Illumina_05	95	20	0.95	0.988611	0.992081	0.924177	0.78477	0.989	0.951	0.979866	0.986577
VF	Illumina_05	95	22	0.95	0.988602	0.99208	0.919147	0.784777	0.987994	0.950975	0.979866	0.986577
VF	Illumina_05	95	25	0.95	0.988608	0.99208	0.919163	0.784777	0.987994	0.950975	0.979866	0.986577
VF	Illumina_05	95	30	0.95	0.98854	0.99208	0.902197	0.784777	0.984492	0.950975	0.979866	0.986577
VF	Illumina_05	100	8	0.95	0.984518	0.98814	0.925931	0.772362	0.990781	0.950024	0.973154	0.979866
VF	Illumina_05	100	10	0.95	0.991198	0.98814	0.933791	0.772362	0.990781	0.950024	0.986577	0.979866
VF	Illumina_05	100	12	0.95	0.991167	0.988139	0.928582	0.772376	0.989801	0.949976	0.986577	0.979866
VF	Illumina_05	100	15	0.95	0.991049	0.988129	0.925842	0.771011	0.989305	0.949441	0.986577	0.979866
VF	Illumina_05	100	18	0.95	0.991514	0.988136	0.921688	0.772396	0.988327	0.949903	0.986577	0.979866
VF	Illumina_05	100	20	0.95	0.991533	0.988135	0.921722	0.772402	0.988321	0.949878	0.986577	0.979866
VF	Illumina_05	100	22	0.95	0.991871	0.988134	0.919872	0.772409	0.987829	0.949854	0.986577	0.979866
VF	Illumina_05	100	25	0.95	0.991869	0.988314	0.919879	0.774072	0.987817	0.950292	0.986577	0.979866
VF	Illumina_05	100	30	0.95	0.991537	0.98809	0.902604	0.770978	0.984421	0.949367	0.986577	0.979866
