# Supplementary material for: High-Specificity Targeted Functional Profiling in Microbial Communities with ShortBRED
Source: PLoS Comput Biol. 2015 Dec 18;11(12):e1004557. doi: 10.1371/journal.pcbi.1004557 (PMC4684307; doi:10.1371/journal.pcbi.1004557)
Supplement: S2 Table — These are yeast centroids which had false positive matches to reads from a synthetic bacterial metagenome at high identity (≥95%) and long length ≥30 amino acids. Source: Kyoto Encyclopedia of Genes and Genomes (KEGG) (Kanehisa et al, 2000 and 2012) (XLSX) [file pcbi.1004557.s012.xlsx]

## Sheet: S2
Table S2 - False Positive Yeast Hits Detected by Centroids in Synthetic Bacterial Metagenome
Yeast Protein	Identity	Length	KEGG Definition
sce:YJR121W	97	33	F1F0 ATP synthase subunit beta (EC:3.6.3.14)
sce:YGR192C	96.9	32	glyceraldehyde-3-phosphate dehydrogenase (phosphorylating) TDH3 (EC:1.2.1.12)
sce:YJR121W	96.8	31	F1F0 ATP synthase subunit beta (EC:3.6.3.14)
sce:YJR121W	97	33	F1F0 ATP synthase subunit beta (EC:3.6.3.14)
sce:YBL099W	96.9	32	F1F0 ATP synthase subunit alpha (EC:3.6.3.14)
sce:YJR121W	100	32	F1F0 ATP synthase subunit beta (EC:3.6.3.14)
sce:YGR192C	97	33	glyceraldehyde-3-phosphate dehydrogenase (phosphorylating) TDH3 (EC:1.2.1.12)
sce:YJR121W	96.9	32	F1F0 ATP synthase subunit beta (EC:3.6.3.14)
sce:YJR121W	97	33	F1F0 ATP synthase subunit beta (EC:3.6.3.14)
sce:YER043C	96.9	32	adenosylhomocysteinase (EC:3.3.1.1)
sce:YJR121W	97	33	F1F0 ATP synthase subunit beta (EC:3.6.3.14)
sce:YGR192C	97	33	glyceraldehyde-3-phosphate dehydrogenase (phosphorylating) TDH3 (EC:1.2.1.12)
sce:YJR121W	97	33	F1F0 ATP synthase subunit beta (EC:3.6.3.14)
sce:YGR061C	97	33	phosphoribosylformylglycinamidine synthase (EC:6.3.5.3)
sce:YJL130C	97	33	bifunctional carbamoylphosphate synthetase/aspartate transcarbamylase (EC:6.3.5.5 2.1.3.2)
