# Supplementary material for: High-Specificity Targeted Functional Profiling in Microbial Communities with ShortBRED
Source: PLOS journal article supplement (doi:10.1371/journal.pcbi.1004557), 2015-12-18

# ShortBRED Specificity on the ARDB, Matching at 95% Identity

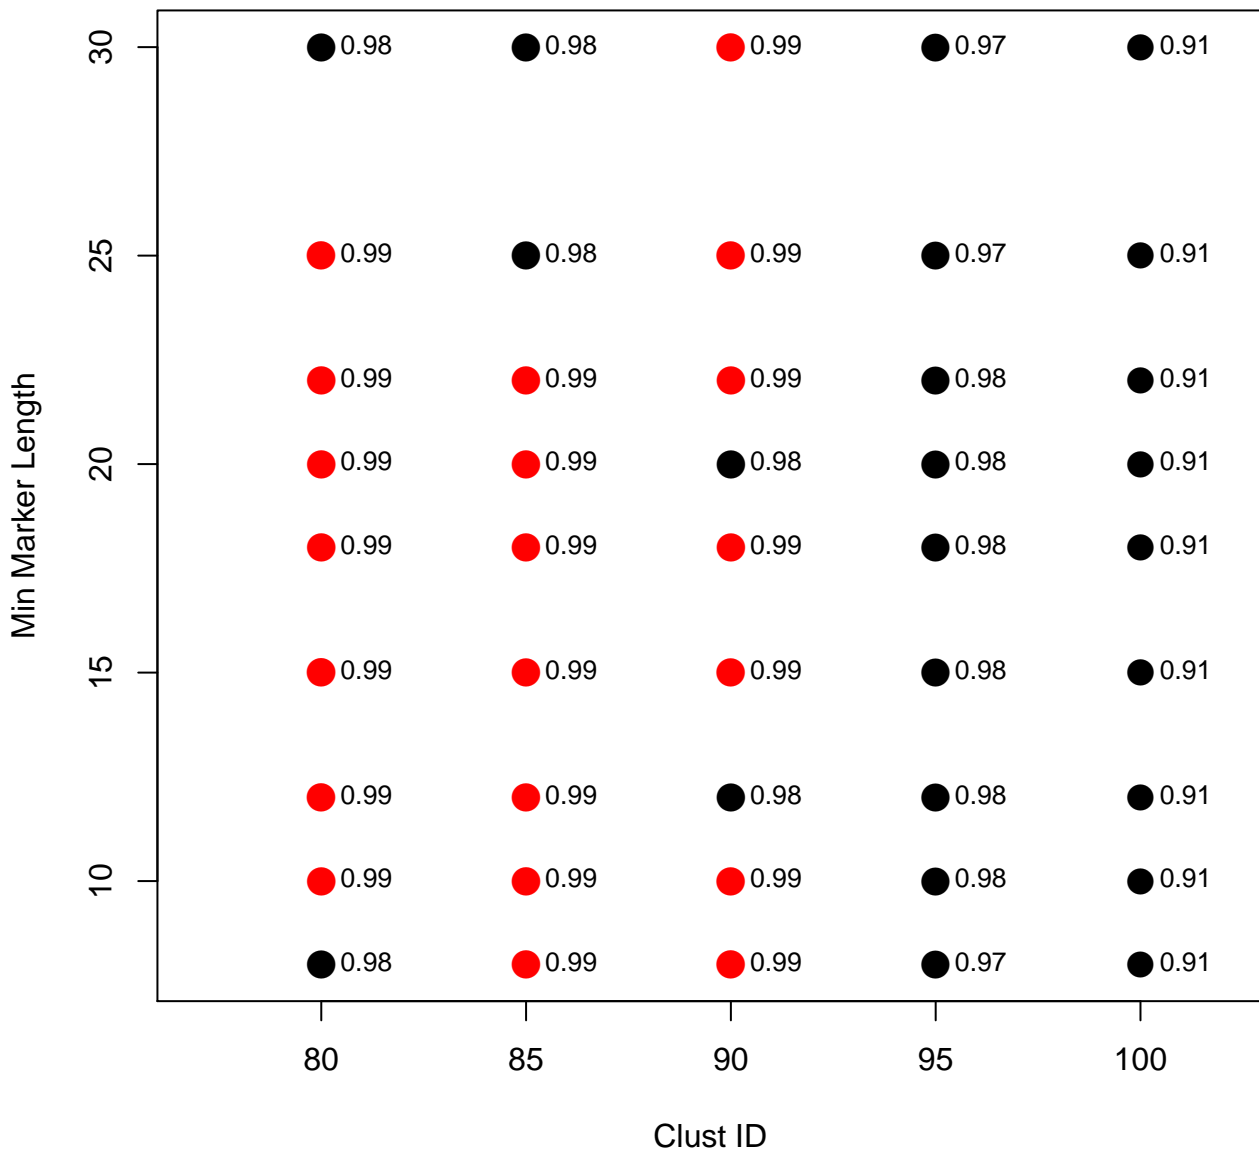

Supplement: S3 (10.1371/journal.pcbi.1004557.s003) [file journal.pcbi.1004557.s003]
